# Supplementary material for: Development of a multi-layered psychosocial care system for children in areas of political violence
Source: Springer Nature journal article supplement (doi:10.1186/1752-4458-4-15), 2010-01-01

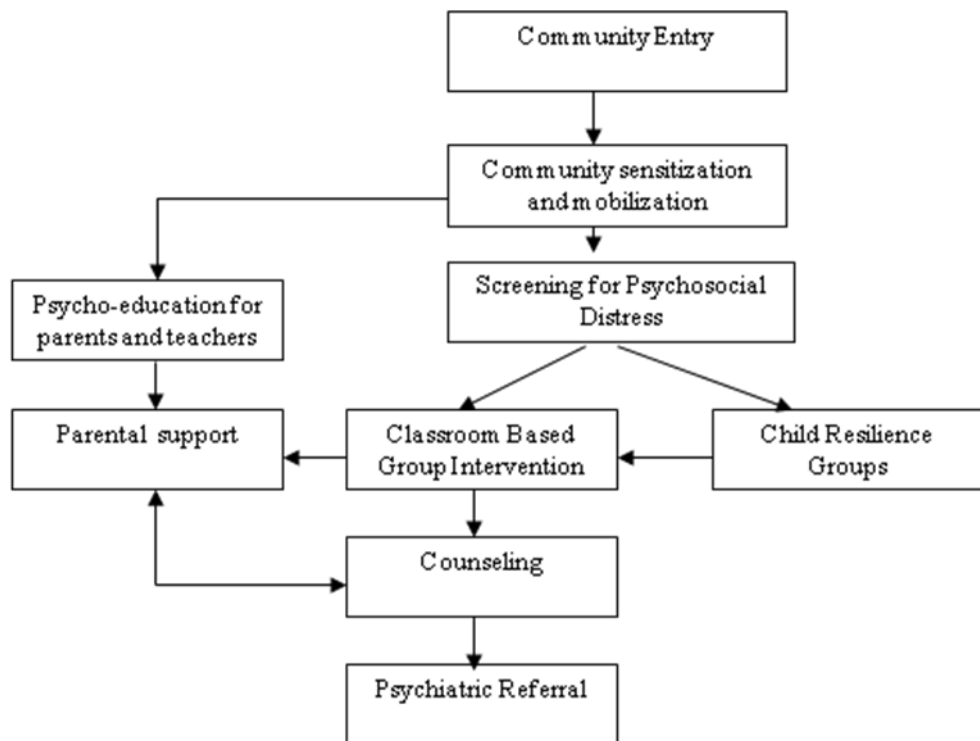

Supplement: 13033_2010_66_MOESM3_ESM.pdf [file 13033_2010_66_MOESM3_ESM.pdf]
